# Supplementary material for: Uniaxial stress flips the natural quantization axis of a quantum dot for integrated quantum photonics
Source: PubMed Central journal article supplement (PMC6076237; doi:10.1038/s41467-018-05499-5), 2018-08-03
Supplement: 41467_2018_5499_MOESM3_ESM.pdf [file 41467_2018_5499_MOESM3_ESM.pdf]

## Description of Additional Supplementary Files

File Name: Supplementary Movie 1

Description: Evolution of the angular dependence of the Bloch wavefunction of the topmost VB states in biaxially prestressed bulk GaAs under variable uniaxial tension. The initial “donut” is characteristic of a conventional heavy-hole state and is invariant for rotations about the z-axis. Under uniaxial tension, the shape resembles a slightly squeezed “donut” with symmetry axis along the pulling direction. Further information is provided in the Supplementary Note 10.
